# Supplementary material
Source: Springer Nature journal article supplement (https://www.springermedizin.de/resource/supplementary/12889_2011_3479_MOESM2_ESM.pdf/9489146)

Suicide

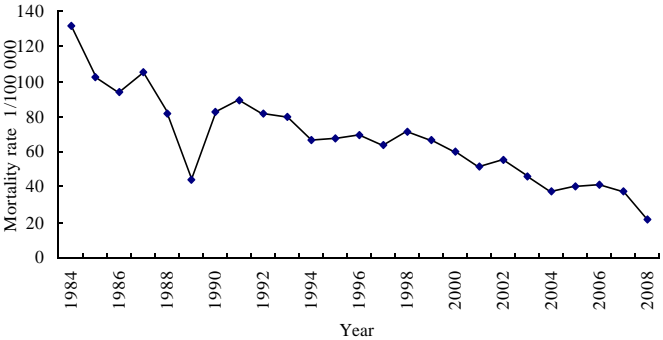

RTI

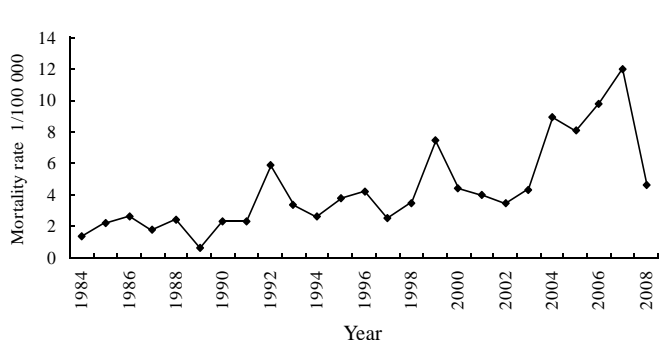

Drowning

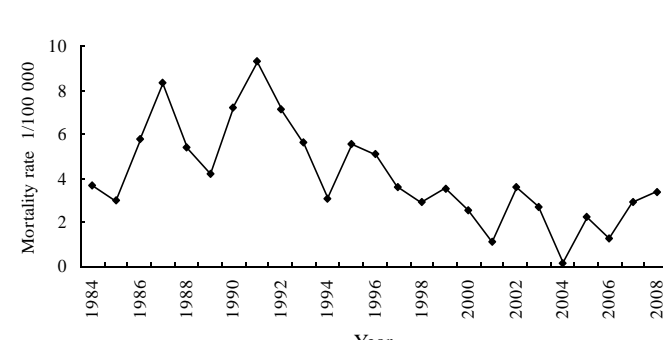

Falls

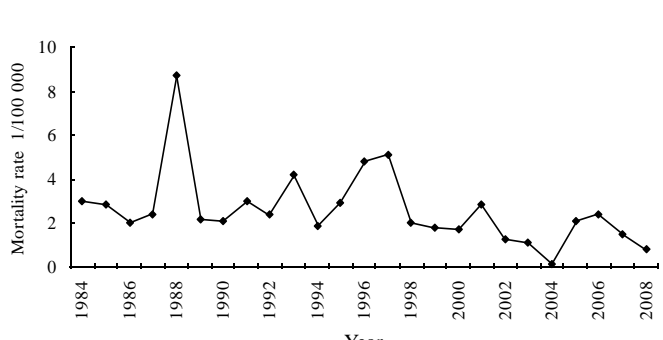

Poisoning

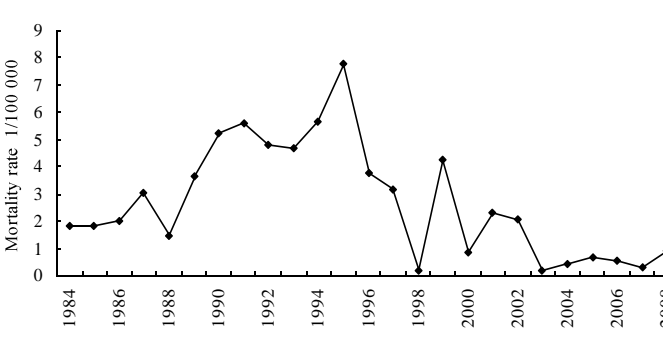

Fire/flames

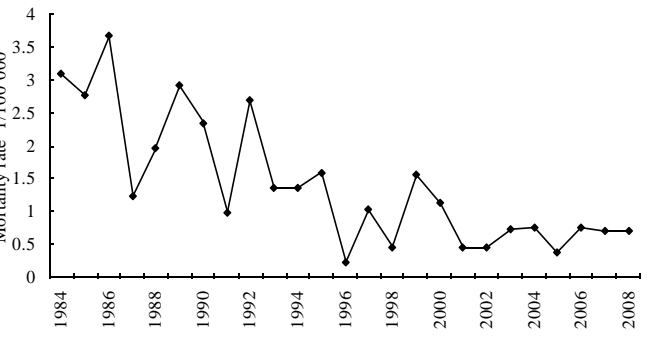

Supplement: MOESM2 [file 9489146]
